# Supplementary material
Source: PubMed Central journal article supplement (PMC11361524)
Supplement: sj-pdf-1-jps-10.1177_24755303211069335.pdf [file sj-pdf-1-jps-10.1177_24755303211069335.pdf]

### **Supplement 1. Transcription rules for presenting quotes**

- The utterance “uhm” was taken out of quotes and not replaced with anything.
- Letters were added to some words or certain words were changed to potentially better reflect what a participant said but which was not clearly understood from the audio recording (essentially, this could be “heard” from the text but was not written as such). The exception was with participants where you could “hear” an accent and/or if it was known that the participant was from another country. In these cases, either words were added, replaced with clarified words that were put in brackets, or left as-is.
- Mention of whether something said by the participant was inaudible was deleted from the text. In some cases, this was replaced with ellipses in brackets (e.g., [...]).
- Words intentionally taken out of the text were replaced with ellipses in brackets.
- Words that were added to clarify the content of a sentence were placed in brackets.
- Mention of actions by the participant during the recording, such as laughter, were put in brackets in the quotes but were italicized to indicate that these are not words from the participant.
- Commas, colons, quotation marks, and other marks of punctuation were added, removed, or adjusted to follow English grammatical rules while still trying to capture the “sound” and flow of what the participant was saying and trying to convey.
- An error occurred during Interview 7, and this interview was not recorded. Thus, any quotes from Interview 7 were not placed in quotation marks because investigators did not have anything to formally quote from the participant. The text is what was recalled and written down from what the participant said in the interview.
- Names of doctors were replaced with ellipses in brackets to help preserve anonymity.
- Brand names were replaced with the generic name placed in brackets.
